# Supplementary material
Source: PubMed Central journal article supplement (PMC7272184)
Supplement: mmc1.pdf [file mmc1.pdf]

# THE LANCET

## Supplementary appendix

This appendix formed part of the original submission. We post it as supplied by the authors.

Supplement to: Menni C, Sudre CH, Steves CJ, Ourselin S, Spector TD. Quantifying additional COVID-19 symptoms will save lives. *Lancet* 2020; published online June 4. [http://dx.doi.org/10.1016/S0140-6736\(20\)31281-2](http://dx.doi.org/10.1016/S0140-6736(20)31281-2).

a)

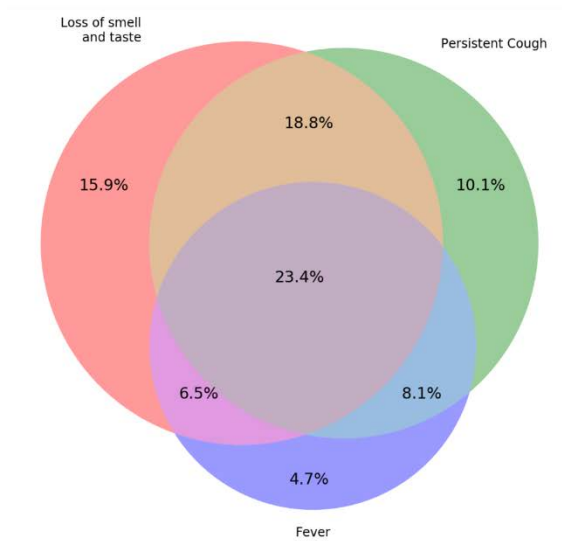

b)

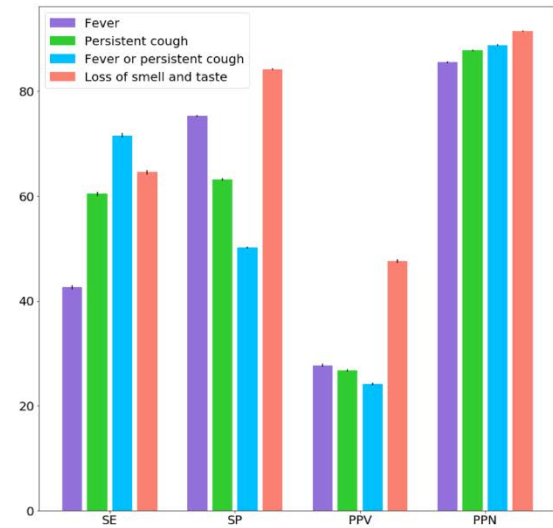

**(a) Venn Diagram representing the percentage of symptoms reported by 13,863 UK symptomatic users of the COVID Symptom study app tested positive to the SARS-CoV-2 swab test. (b) Sensitivity, specificity, positive predicted value and negative predicted value of fever, cough, fever or cough and loss of smell in 76,260 users of the COVID Symptom study app, who underwent the SARS-CoV-2 test (13,863 testing positive, 62,397 testing negative)**

We thank participants of the app and study volunteers enrolled in cohorts within the Coronavirus Pandemic Epidemiology (COPE) consortium. Zoe Global provided in-kind support for all aspects of building, running, and supporting the app and service to all users worldwide. Investigators received support from Wellcome, the Medical Research Council/British Heart Foundation, Alzheimer's Society, EU, NIHR, CDRF, and the NIHR-funded BioResource, Clinical Research Facility and BRC based at GSTT NHS Foundation Trust in partnership with KCL.
